# Supplementary material
Source: PubMed Central journal article supplement (PMC4089881)
Supplement: NIHMS590877-supplement-supplement_1.pdf [file NIHMS590877-supplement-supplement_1.pdf]

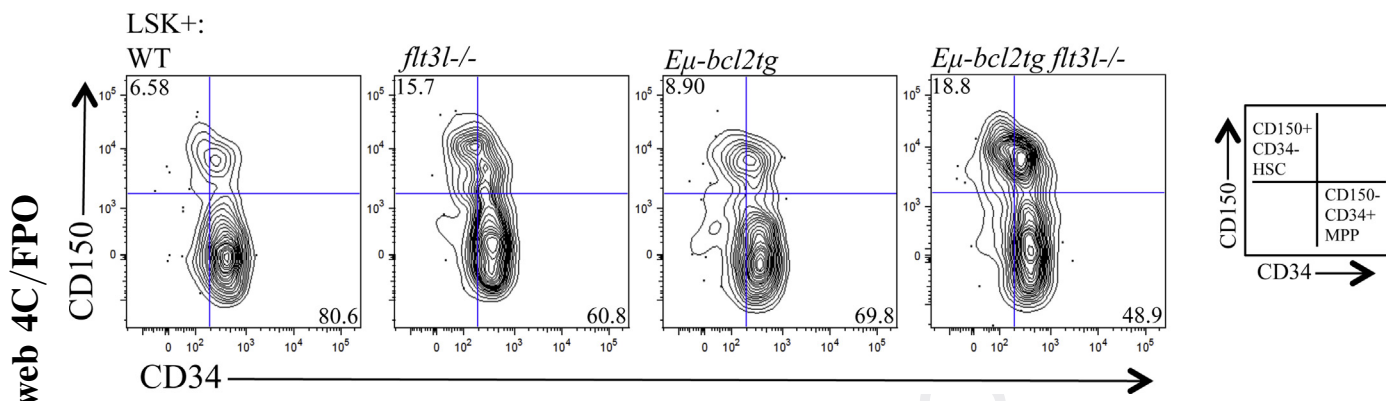

1598  
1599  
1600  
1601  
1602  
1603  
1604  
1605  
1606  
1607  
1608  
1609  
1610  
1611  
1612  
1613  
1614  
1615  
1616  
1617  
1618  
1619  
1620  
1621  
1622  
1623  
1624  
1625  
1626  
1627  
1628  
1629  
1630  
1631  
1632  
1633  
1634  
1635  
1636  
1637  
1638  
1639  
1640

**Supplementary Figure E1.** Enforced expression of Bcl2 does not affect the increased frequency of HSCs in *flt3l<sup>-/-</sup>* mice. Flow cytometric analysis of CD150 versus CD34 (pregated on LSK<sup>+</sup>) from a representative WT, *flt3l<sup>-/-</sup>*, *Eμ-bcl2tg*, and *Eμ-bcl2tg flt3l<sup>-/-</sup>* mouse to examine LSK<sup>+</sup>CD150<sup>+</sup>CD34<sup>-</sup> HSCs and LSK<sup>+</sup>CD150<sup>-</sup>CD34<sup>+</sup> MPPs. Data are representative of four to five mice per genotype and four independent experiments.

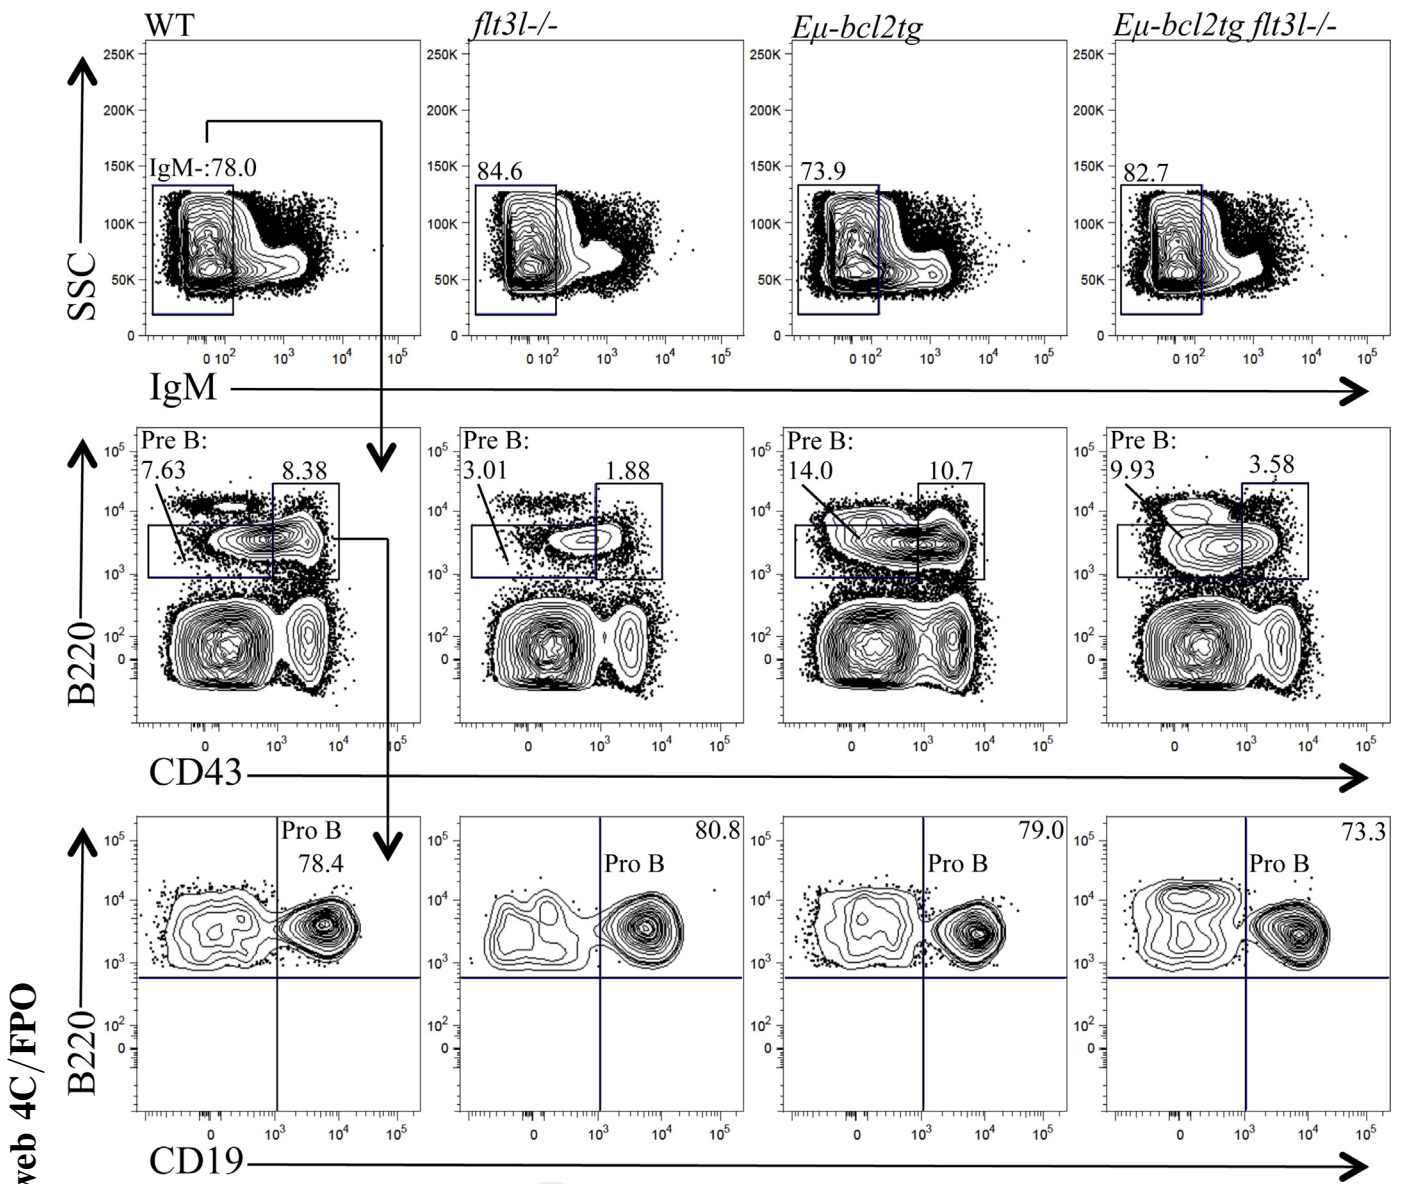

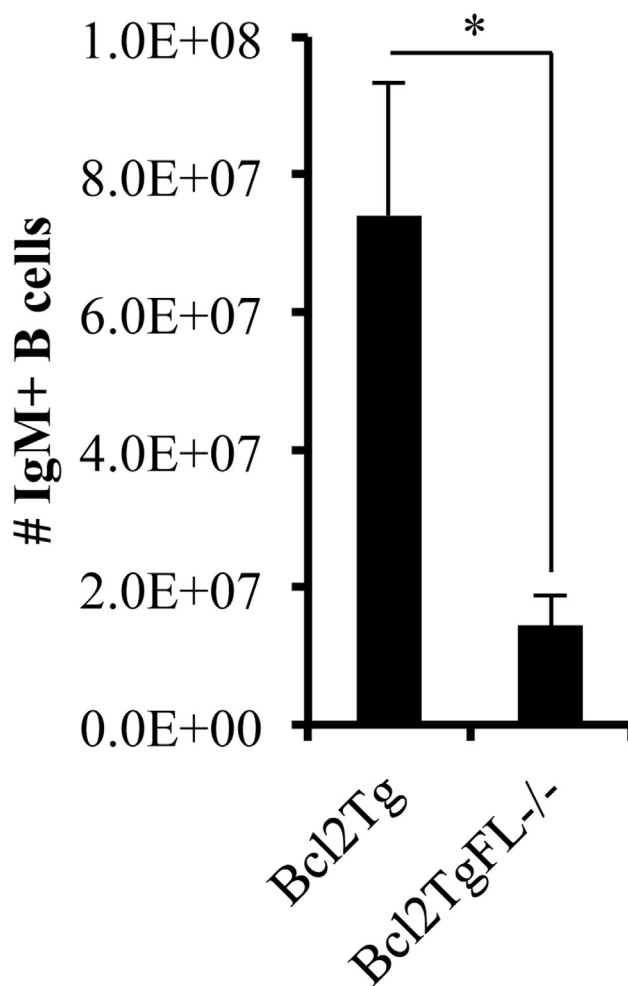

**Supplementary Figure E3.** Reduction in peripheral B cells in *E $\mu$ -bcl2tg flt3l<sup>-/-</sup>* mice. Mean  $\pm$  SEM of IgM<sup>+</sup> B cells in the spleens of *E $\mu$ -bcl2tg* and *E $\mu$ -bcl2tg flt3l<sup>-/-</sup>* mice. Data were obtained in four independent experiments and represent five to eight mice per genotype. \* $p \leq 0.05$ , Student *t* test, between the means of the two genotypes.
